# Supplementary material
Source: publisher figshare collection journal article supplement (https://acs.figshare.com/ndownloader/files/5761638)
Supplement: Supplementary file 1 [file 5761638]

## Supporting Information

### Regiospecific Glycosidation of Unprotected Sugars via Arylboronic Activation

Kenji Oshima and Yasuhiro Aoyama

Department of BioEngineering, Nagaoka University of Technology,  
Kamitomioka, Nagaoka, Niigata 940-2188, Japan and Institute for  
Fundamental Research of Organic Chemistry, Kyushu University,  
Hakozaki, Higashi-ku, Fukuoka 812-8581, Japan

#### Preparation and Characterization of Compound 3

Compound 3 was obtained in 49% yield as colorless crystals by the metalation of 2-(2-hydroxy-2-propyl)-1-bromobenzene (1 equiv) with BuLi (2 equiv) in ether-hexane followed by the reaction of the resulting dilithium species with B(OCH<sub>3</sub>)<sub>3</sub> (2 equiv) in ether at -70 °C for 20 h and subsequent hydrolysis with dilute H<sub>2</sub>SO<sub>4</sub>: mp 182-184 °C; <sup>1</sup>H NMR (CDCl<sub>3</sub>) 7.21-7.12 (6 H, m, Ar), 6.99 (2 H, d, Ar), 1.49 (12 H, s, CH<sub>3</sub>); <sup>13</sup>C NMR (THF-*d*<sub>8</sub>) 153.8, 130.4, 127.7, 127.2, 120.5, 84.3, 31.2; <sup>11</sup>B NMR (CDCl<sub>3</sub>) -4.0. Anal. Calcd for C<sub>18</sub>H<sub>21</sub>BO<sub>2</sub>: C, 77.17; H, 7.55. Found: C, 76.98; H, 7.55. Compound 3 in THF-*d*<sub>8</sub> showed a highly downfield shifted OH-proton resonance at δ<sub>H</sub> = 11.7. This, coupled with the significantly upfield shifted <sup>11</sup>B signal, provides the basis for the formulation of borinate 3 as a zwitterionic species. Treatment of 3 in THF with an equimolar amount of Ag<sub>2</sub>CO<sub>3</sub> gave an intermediate 2c' having two types of phenyl moieties and methyl groups. An acidic workup of the mixture afforded a 1:1 mixture of 2-phenyl-2-propanol and boronate 2c in 70% yield as colorless crystals: mp ~78 °C; <sup>1</sup>H NMR (CDCl<sub>3</sub>) 7.73 (1 H, d, Ar), 7.47 (1 H, t, Ar), 7.35 (1 H, t, Ar), 7.26 (1 H, d, Ar), 1.59 (6 H, s, CH<sub>3</sub>); <sup>13</sup>C NMR (THF-*d*<sub>8</sub>) 163.4, 131.2, 131.1, 127.5, 121.1, 83.5, 29.7. Anal. Calcd for C<sub>9</sub>H<sub>11</sub>BO<sub>2</sub>: C, 66.73; H, 6.84. Found: C, 67.06; H, 6.88.

### Typical Glycosidation Procedure for Entry 2 of Table 1

A mixture of promoter **3** (0.46 mmol), acceptor **4a** (0.42 mmol), donor **5** (1.48 mmol), and MS 4A (1.5 g) in dry THF (20 mL) was refluxed for 1 h.  $\text{Et}_4\text{N}^+\text{I}^-$  (0.48 mmol) was added at 0 °C and the mixture was stirred at room temperature for 30 min. Then,  $\text{Ag}_2\text{CO}_3$  (0.87 mmol) was added at 0 °C to initiate the reaction. The mixture was stirred at room temperature for 48 h and at 50 °C for 20 h, diluted with dichloromethane, and filtered to remove insoluble salts.

Dichloromethane was evaporated and the residue was chromatographed on silica gel with acetone-dichloromethane (3/7) as eluent. Elution of donor **5** used in excess and 2-phenyl-2-propanol derived from promoter **3** was followed by that of product disaccharide **4b** (199 mg, 93 %). In every case, more than 80 % of excess amount of donor **5** was recovered. Glycosidation of other acceptors was carried out in essentially the same manner. The progress of the reactions was readily monitored by TLC. The TLC  $R_f$  values and the solvent systems used for both TLC and column chromatography are shown in Chart 2 in this Supporting Information.

**Chart 2.** Structures of Disaccharide and Trisaccharide Products and Their Peracetyl Derivatives. TLC  $R_f$  values on silica with eluent of acetone/dichloromethane = 3/7 (A), 1/1 (B), or 9/1 (C) are shown in parentheses.

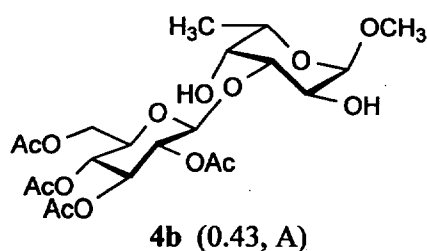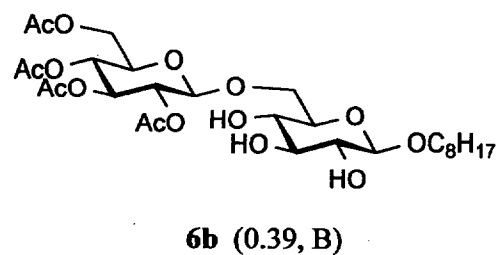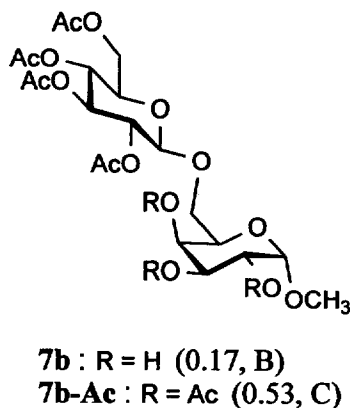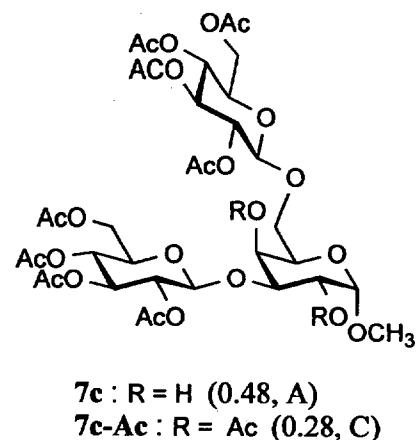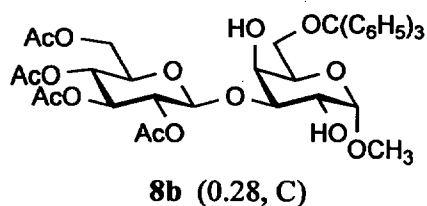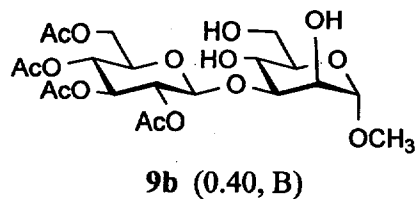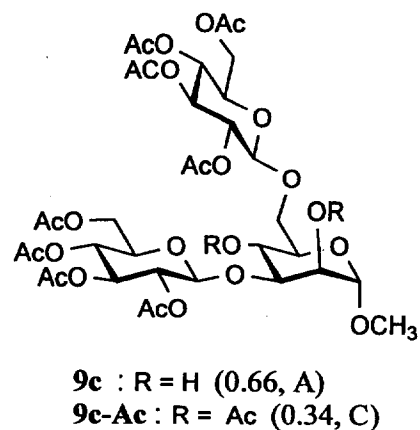

**Table 2.**  $^1\text{H}$  NMR Chemical Shifts for Disaccharide and Trisaccharide Products and Their Peracetyl Derivatives <sup>a, b</sup>

| compound     | solvent                       | H-1 ( $J_{1,2}$ ) <sup>c</sup>         | H-2                  | H-3                  | H-4                  | H-5                  | H-6                                    | OCH <sub>3</sub>        |
|--------------|-------------------------------|----------------------------------------|----------------------|----------------------|----------------------|----------------------|----------------------------------------|-------------------------|
| <b>4b</b>    | CDCl <sub>3</sub>             | 4.77 (3.9)<br>4.65 (7.7)               | 3.94<br>4.99         | 3.79<br>5.18         | 3.67<br>5.03         | 3.87<br>3.72         | 1.25<br>4.19, 4.13                     | 3.37                    |
| <b>6b</b>    | CDCl <sub>3</sub>             | 4.23 (7.3)<br>4.64 (7.8)               | 3.33<br>5.00         | 3.50<br>5.19         | 3.43<br>5.07         | 3.43<br>3.70         | 4.09, 3.78<br>4.25, 4.16               | 3.86, 3.50 <sup>d</sup> |
| <b>7b-Ac</b> | CDCl <sub>3</sub>             | 4.91 (3.4)<br>4.50 (7.8)               | 5.07<br>4.91         | 5.27<br>5.13         | 5.36<br>5.01         | 4.12<br>3.66         | 3.74, 3.60<br>4.21, 4.08               | 3.34                    |
| <b>7c-Ac</b> | CDCl <sub>3</sub>             | 4.85 (3.9)<br>4.63 (7.8)<br>4.49 (7.8) | 5.10<br>4.87<br>4.96 | 4.15<br>5.13<br>5.16 | 5.34<br>5.02<br>5.04 | 3.49<br>3.61<br>3.68 | 4.06, 3.87<br>4.15-4.11<br>4.26, 4.08  | 3.34                    |
| <b>8b</b>    | CDCl <sub>3</sub>             | 4.82 (3.4)<br>4.79 (8.3)               | 3.96<br>5.01         | 3.78<br>5.24         | 4.00<br>5.03         | 3.88<br>3.72         | 3.52-3.40, 3.27<br>4.19, 4.09          | 3.49                    |
| <b>9b</b>    | CDCl <sub>3</sub>             | 4.69 (1.5)<br>4.60 (7.8)               | 3.80<br>4.98         | 3.70<br>5.18         | 3.89<br>5.00         | 3.49<br>3.76         | 3.81<br>4.14                           | 3.32                    |
| <b>9c-Ac</b> | C <sub>6</sub> D <sub>6</sub> | 4.65 (1.5)<br>4.16 (7.8)<br>4.34 (7.3) | 5.40<br>5.08<br>5.35 | 4.17<br>5.28<br>5.41 | 5.47<br>5.15<br>5.24 | 3.93<br>3.07<br>3.22 | 4.08, 3.59<br>4.28, 3.84<br>4.24, 3.98 | 3.11                    |

<sup>a</sup> The disaccharide and trisaccharide products were isolated by chromatography and further converted to peracetyl derivatives when necessary. The glycosidation sites were assigned on the basis of  $^1\text{H}$ - $^1\text{H}$  and  $^1\text{H}$ - $^{13}\text{C}$  COSY spectra in reference to the glycosidation-induced shifts in  $\delta_{\text{C}}$  (Usui, T.; Yamaoka, K.; Matsuda, K.; Tuzimura, K.; Sugiyama, H.; Seto, S. *J. Chem. Soc., Perkin Trans. I* 1973, 2425-2432) and the acetylation-induced shifts in  $\delta_{\text{H}}$  (e.g. Lemieux, R. U.; Stevens, J. D. *Can. J. Chem.* 1965, 43, 2059-2070. Casu, B.; Reggiani, M.; Gallo, G. G.; Vigevani, A. *Carbohydr. Res.* 1970, 12, 157-170). The acetyl-proton resonances appear at  $\delta_{\text{H}} \cong 2.1$ . <sup>b</sup> For each saccharide, data for the glycosyl acceptor moiety are shown in the top line, followed by those for the donor (5) moiety in the lower line(s). <sup>c</sup> The coupling constant of  $J \cong 8$  Hz for 1-H and 2-H in the donor (5) moiety of every product confirmed the  $\beta$ -configuration of the glycosidic linkage. <sup>d</sup> For  $\text{OCH}_2(\text{CH}_2)_6\text{CH}_3$  in the octyl group.

**Table 3.**  $^{13}\text{C}$  NMR Chemical Shifts for Disaccharide and Trisaccharide Products and Their Peracetyl Derivatives <sup>a, b</sup>

| compound     | solvent                       | C-1    | C-2   | C-3   | C-4   | C-5   | C-6   | OCH <sub>3</sub>   |
|--------------|-------------------------------|--------|-------|-------|-------|-------|-------|--------------------|
| <b>4b</b>    | CDCl <sub>3</sub>             | 99.33  | 66.96 | 82.23 | 70.75 | 65.13 | 15.86 | 55.20              |
|              |                               | 100.54 | 71.37 | 72.26 | 68.11 | 71.99 | 61.58 |                    |
| <b>6b</b>    | CDCl <sub>3</sub>             | 102.44 | 73.58 | 76.27 | 70.87 | 74.73 | 69.08 | 70.16 <sup>c</sup> |
|              |                               | 100.90 | 71.18 | 72.68 | 68.31 | 71.92 | 61.79 |                    |
| <b>7b-Ac</b> | CDCl <sub>3</sub>             | 96.97  | 68.11 | 67.51 | 68.61 | 67.40 | 67.98 | 55.26              |
|              |                               | 100.65 | 71.02 | 72.61 | 68.20 | 71.75 | 61.73 |                    |
| <b>7c-Ac</b> | CDCl <sub>3</sub>             | 96.86  | 70.21 | 72.23 | 70.29 | 69.17 | 68.44 | 55.11              |
|              |                               | 100.34 | 71.15 | 72.50 | 68.15 | 71.77 | 61.38 |                    |
|              |                               | 100.94 | 71.09 | 72.57 | 68.20 | 71.73 | 61.63 |                    |
| <b>8b</b>    | CDCl <sub>3</sub>             | 99.17  | 67.90 | 80.90 | 68.95 | 69.01 | 63.41 | 55.11              |
|              |                               | 101.34 | 71.35 | 72.25 | 68.42 | 71.84 | 61.91 |                    |
| <b>9b</b>    | CDCl <sub>3</sub>             | 100.41 | 69.58 | 83.58 | 65.41 | 71.68 | 61.80 | 54.76              |
|              |                               | 101.07 | 71.33 | 72.28 | 68.37 | 71.95 | 61.93 |                    |
| <b>9c-Ac</b> | C <sub>6</sub> D <sub>6</sub> | 98.58  | 73.25 | 75.88 | 67.01 | 70.30 | 68.73 | 54.70              |
|              |                               | 100.18 | 71.88 | 73.39 | 68.16 | 71.94 | 61.47 |                    |
|              |                               | 101.37 | 71.69 | 69.59 | 68.73 | 72.13 | 61.63 |                    |

<sup>a</sup> The disaccharide and trisaccharide products were isolated by chromatography and further converted to peracetyl derivatives when necessary. The glycosidation sites were assigned on the basis of  $^1\text{H}$ - $^1\text{H}$  and  $^1\text{H}$ - $^{13}\text{C}$  COSY spectra in reference to the glycosidation-induced shifts in  $\delta_{\text{C}}$  (Usui, T.; Yamaoka, K.; Matsuda, K.; Tuzimura, K.; Sugiyama, H.; Seto, S. *J. Chem. Soc., Perkin Trans. I* 1973, 2425-2432) and the acetylation-induced shifts in  $\delta_{\text{H}}$  (e.g. Lemieux, R. U.; Stevens, J. D. *Can. J. Chem.* 1965, 43, 2059-2070. Casu, B.; Reggiani, M.; Gallo, G. G.; Vigevani, A. *Carbohydr. Res.* 1970, 12, 157-170). The acetyl-carbon resonances appear at  $\delta_{\text{C}}$  = 20-21 and 169-171. <sup>b</sup> For each saccharide, data for the glycosyl acceptor moiety are shown in the top line, followed by those for the donor (5) moiety in the lower line(s). <sup>c</sup> For  $\text{OCH}_2(\text{CH}_2)_6\text{CH}_3$  in the octyl group.

**Table 4.** Elemental Analysis and HRMS Data for Disaccharide and Trisaccharide Products

| compound  | formula                                         | elemental analysis |      |       |      | HRMS                |          |
|-----------|-------------------------------------------------|--------------------|------|-------|------|---------------------|----------|
|           |                                                 | calcd              |      | found |      | calcd for           | found    |
|           |                                                 | C                  | H    | C     | H    | (M+Na) <sup>+</sup> |          |
| <b>4b</b> | C <sub>21</sub> H <sub>32</sub> O <sub>14</sub> | 49.61              | 6.34 | 50.42 | 6.50 | 531.1690            | 531.1689 |
| <b>6b</b> | C <sub>28</sub> H <sub>46</sub> O <sub>15</sub> | 54.01              | 7.45 | 55.10 | 7.90 | 645.2734            | 645.2709 |
| <b>7b</b> | C <sub>21</sub> H <sub>32</sub> O <sub>15</sub> | 48.09              | 6.15 | 48.14 | 6.21 | 547.1639            | 547.1627 |
| <b>7c</b> | C <sub>35</sub> H <sub>50</sub> O <sub>24</sub> | 49.18              | 5.90 | 49.25 | 5.93 | 877.2590            | 877.2595 |
| <b>8b</b> | C <sub>40</sub> H <sub>46</sub> O <sub>15</sub> | 62.66              | 6.05 | 62.87 | 6.21 | 789.2734            | 789.2722 |
| <b>9b</b> | C <sub>21</sub> H <sub>32</sub> O <sub>15</sub> | 48.09              | 6.15 | 47.90 | 6.31 | 547.1639            | 547.1613 |
| <b>9c</b> | C <sub>35</sub> H <sub>50</sub> O <sub>24</sub> | 49.18              | 5.90 | 49.20 | 6.05 | 877.2590            | 877.2592 |
